# Supplementary material for: Comparison of a New 5% Minoxidil Foam and Rogaine® in the Treatment of Androgenetic Alopecia in Chinese Men: A Randomized, Double‐Blind, Phase III, Equivalence Trial
Source: Hindawi journal article supplement (doi:10.1155/2023/4582911), 2023-01-01
Supplement: f1 [file 4582911.f1.docx]

**Supplement Table 1.** Sensitivity analysis of the equivalence test for non-vellus TAHC after 24 weeks of treatment using the MMRM model.

| **Time** | **Variables** | **FAS** | | **PPS** | |
| --- | --- | --- | --- | --- | --- |
| **5% NMF group (n=211)** | **Rogaine® group (n=206)** | **5% NMF group (n=189)** | **Rogaine® group (n=196)** |
| Baseline |  |  |  |  |  |
|  | Non-vellus TAHC, hair/cm2, mean ± SD | 112.74 ± 28.53 | 116.26 ± 31.78 | 112.98 ± 28.43 | 115.59 ± 31.17 |
| Week 24 | Total |  |  |  |  |
|  | Non-vellus TAHC, hair/cm2, mean ± SD | 128.41 ± 28.29 | 133.33 ± 29.90 | 128.32 ± 28.36 | 133.90 ± 28.92 |
|  | Change of non-vellus TAHC, hair/cm2, mean ± SD | 15.01 ± 16.63 | 18.01 ± 19.48 | 15.07 ± 16.69 | 18.34 ±19.32 |
| MMRM model | Mean difference, hair/cm2, mean ± SE | -2.41 ± 1.35 | | -2.49 ± 1.39 | |
| 95% CI of mean difference | (-5.07, 0.25) | | (-5.22, 0.24) | |

Note: MMRM, mixed-effects model repeated measures; FAS, full-analysis set; PPS, per-protocol set; NMF, 5% new minoxidil foam; TAHC, non-vellus target area hair counts.
